# Supplementary material for: Acute heat priming promotes short-term climate resilience of early life stages in a model sea anemone
Source: PeerJ journal article supplement (doi:10.7717/peerj.16574), 2023-12-05

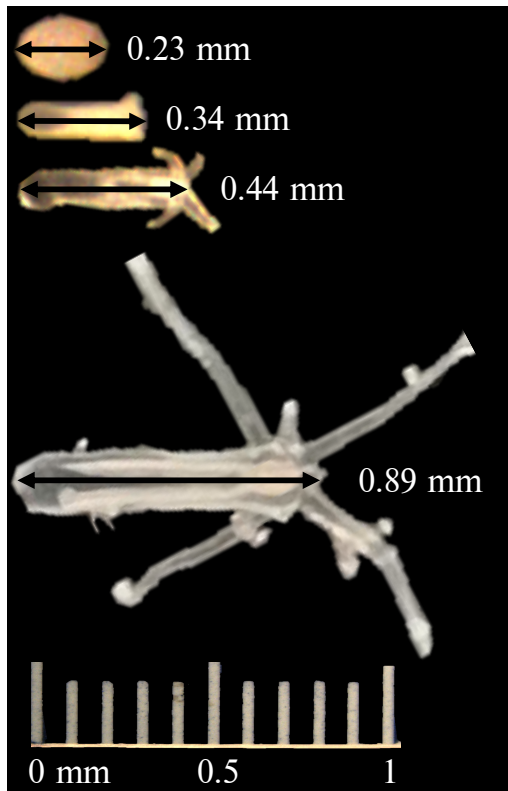

Supplement: Figure_S1.pdf [file Figure_S1.pdf]
